# Supplementary material for: Negative thermal expansion of water in hydrophobic nanospaces
Source: Royal Society of Chemistry journal article supplement (doi:10.1039/c1cp22954k), 2011-11-30

### Figure captions for supplementary figures

Fig. S1. SAXS profiles of water adsorbed on A25 at 277 K at different amount of adsorbed  $m = 0$  (black), 300 (red), 500(blue), 650(green), 950 (purple) and 1100  $\text{mg g}^{-1}$ (sky blue), respectively.

Fig. S2. Debye-Bueche plots of the SAXS profiles of water adsorbed on A25 by  $\phi = 0.85$  at 20 K (red), 120 K (blue), 200 K(black), 225 K(green), 250 K(sky blue), 277 K(purple) and 298 K (light green).

Fig. S3. The temperature dependence of  $I_0$ , which are determined by Debye-Bueche analysis of SAXS profiles of water adsorbed on A25.

Fig. S4. The temperature dependence of  $\xi$  which are earned by Debye-Bueche analysis of SAXS profiles of water adsorbed on A25.

Fig. S1 (supplement) Iiyama

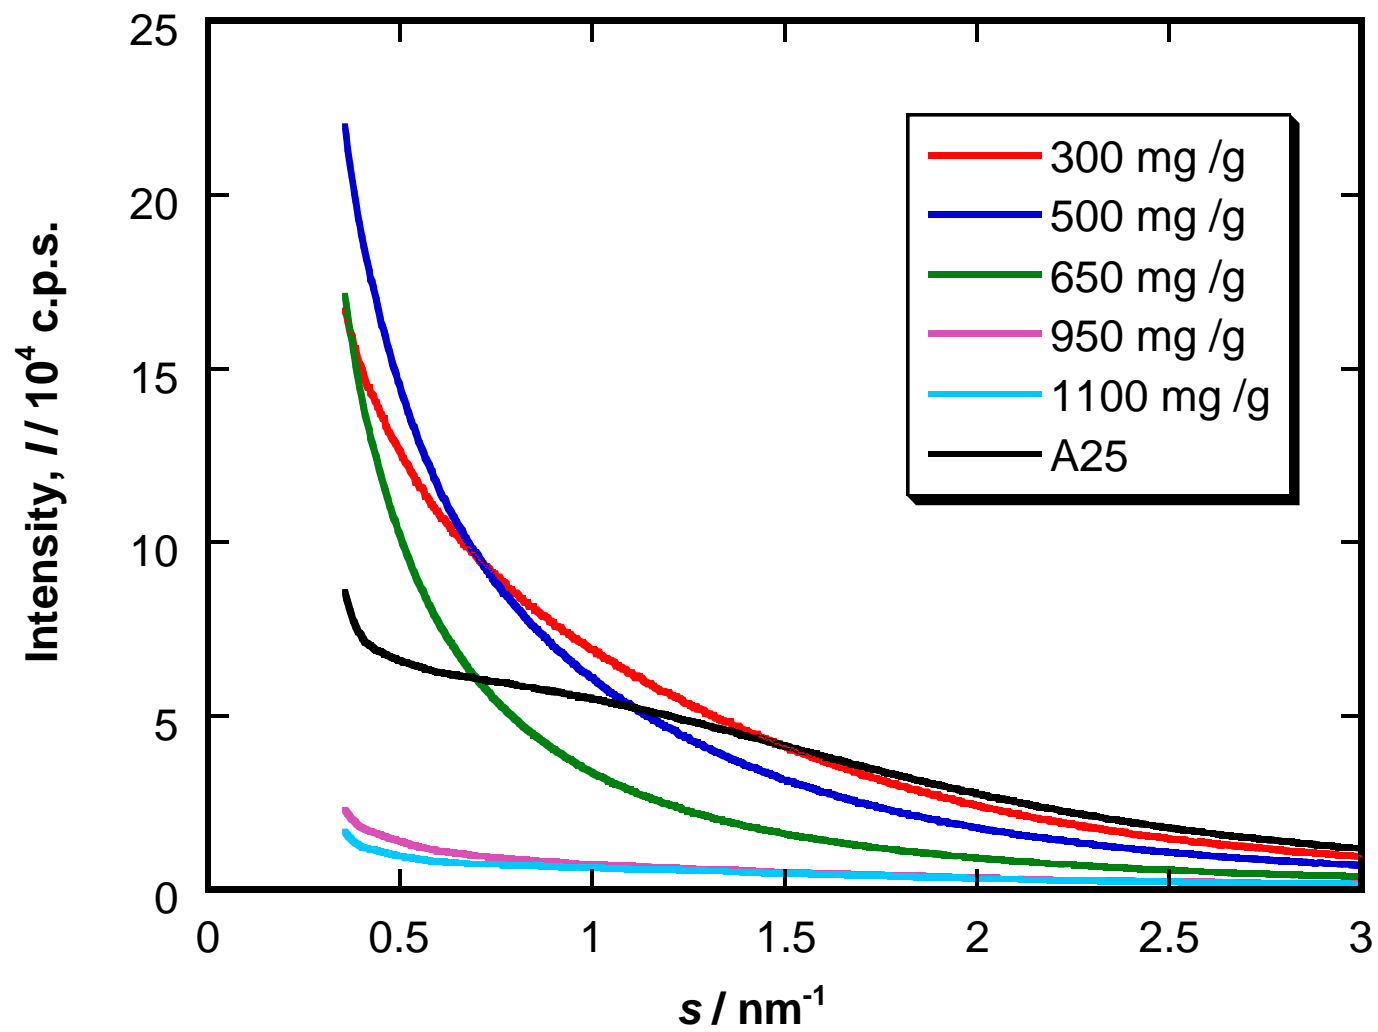

Fig. S2 (supplement)

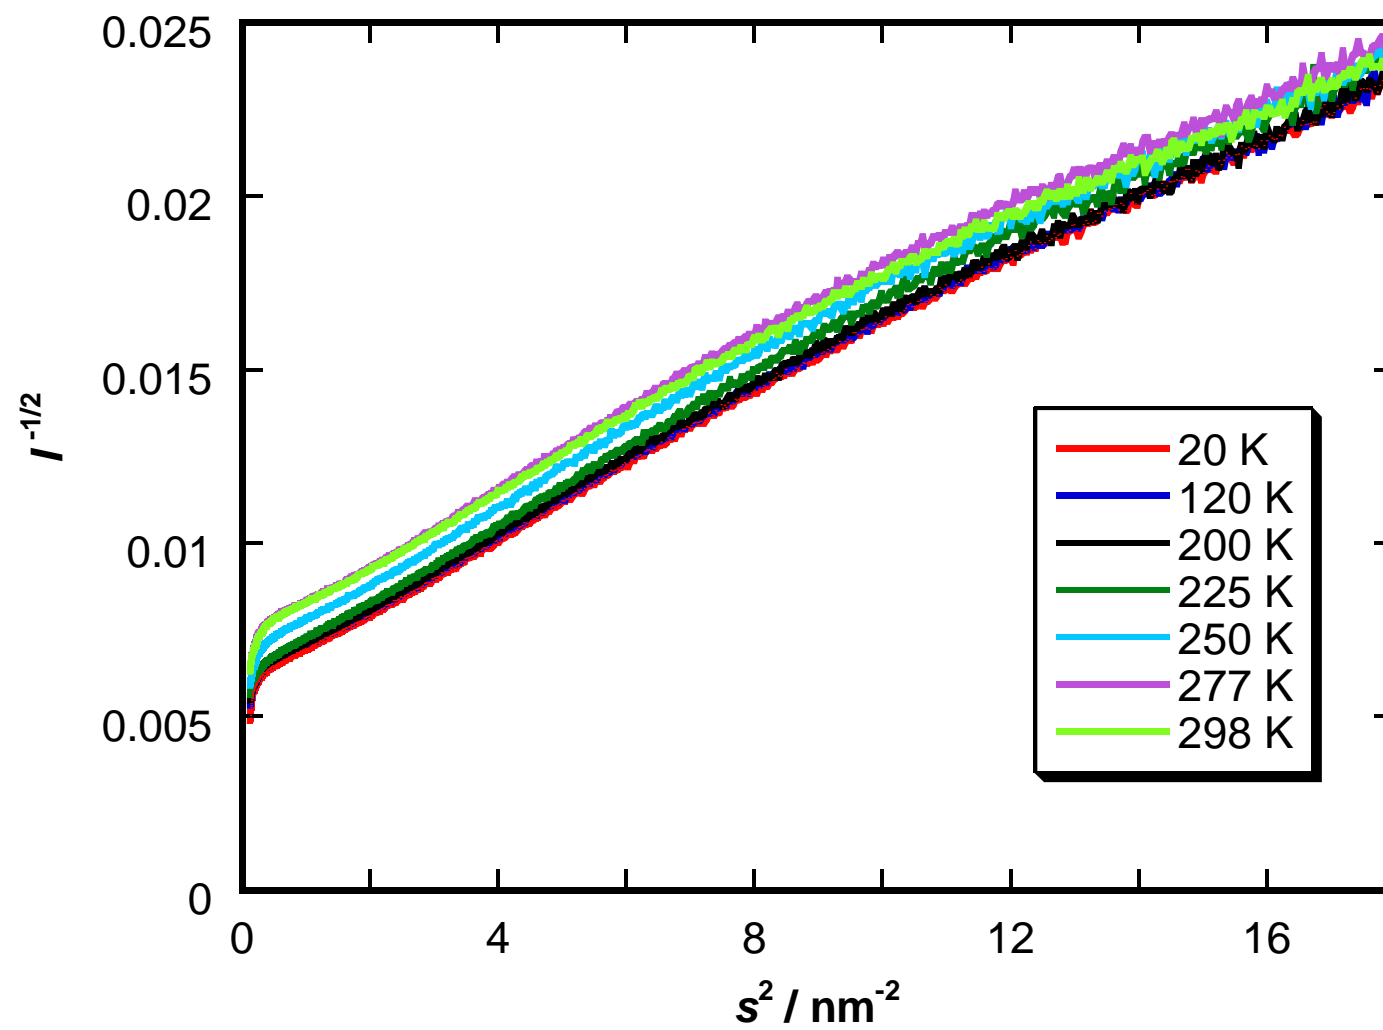

Fig. S3 (supplement)

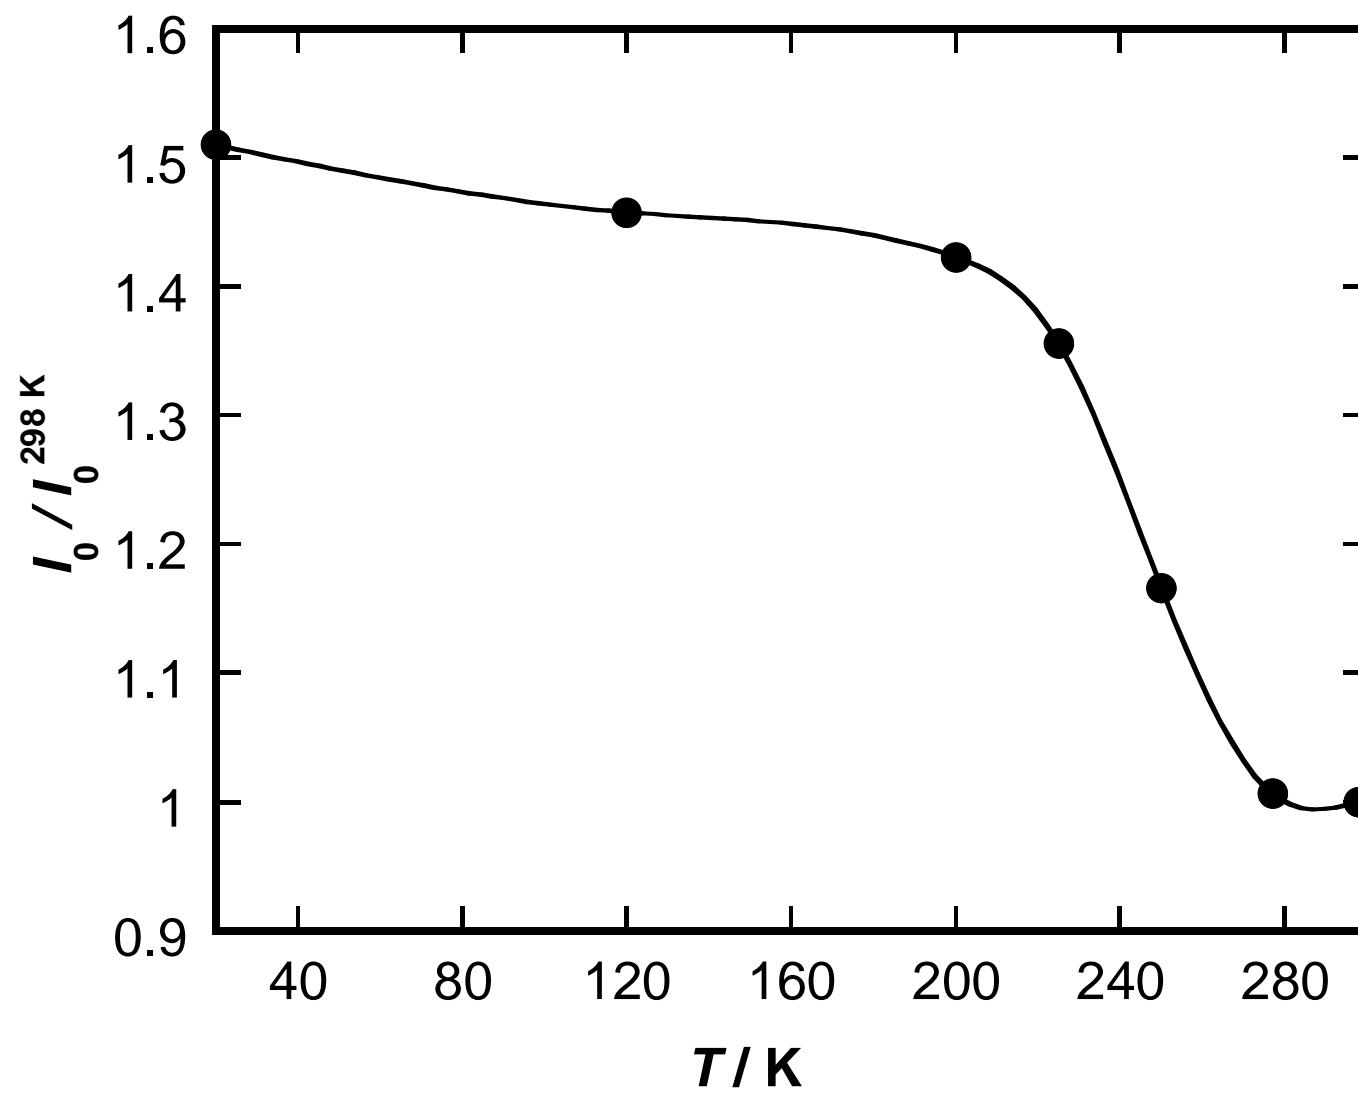

Fig. S4 (supplement)

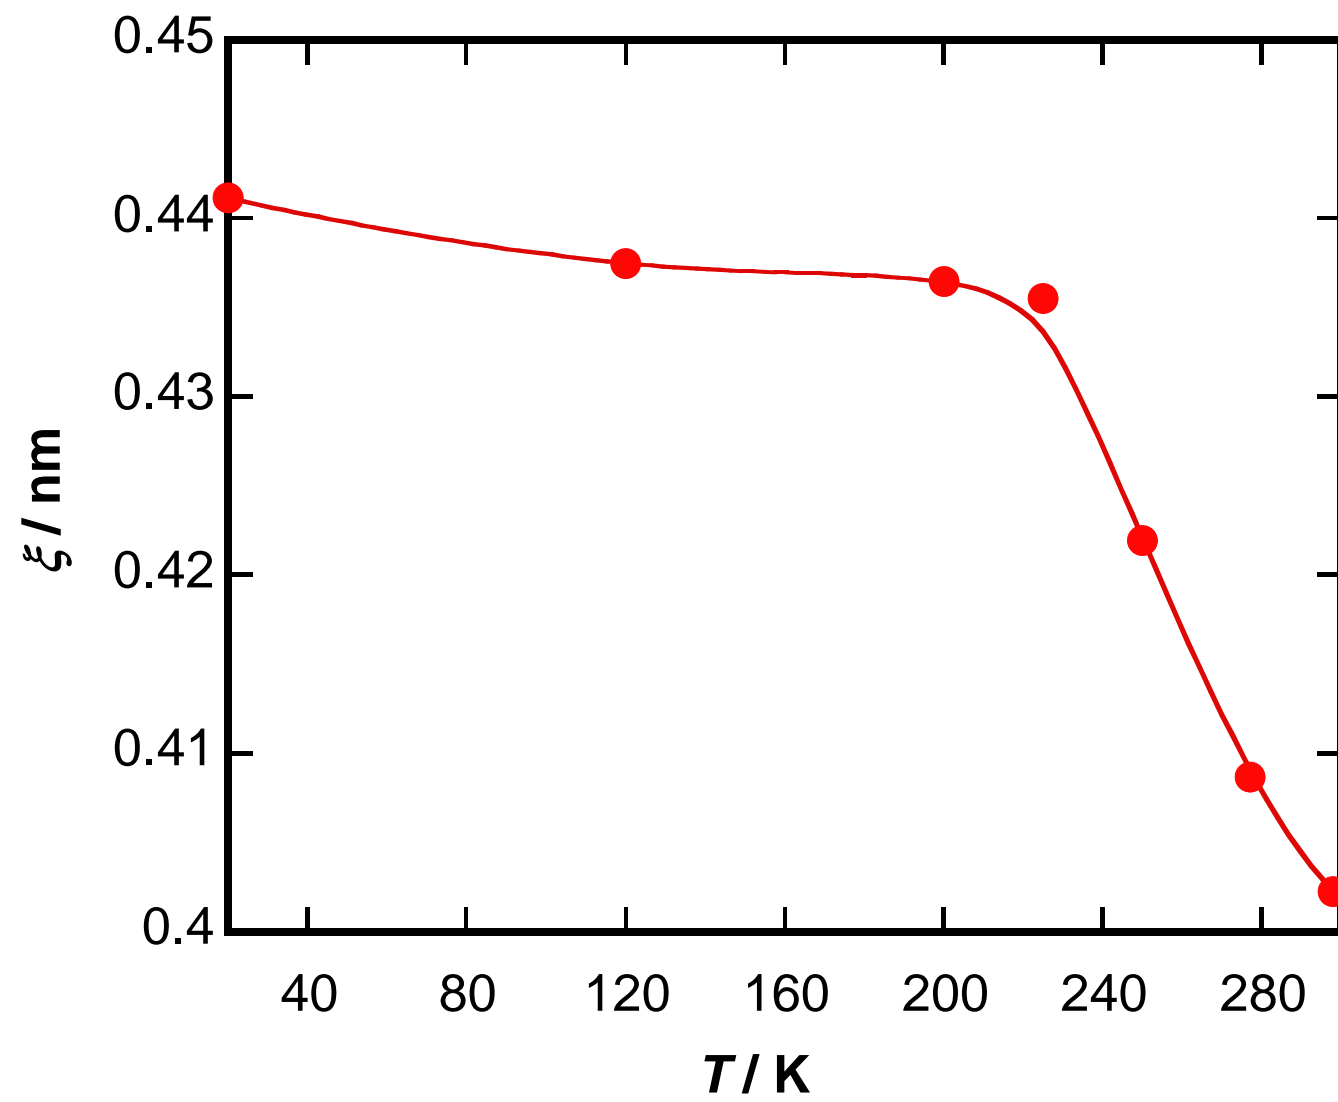

Supplement: c1cp22954k.pdf [file c1cp22954k.pdf]
